# Supplementary material for: Clustering reveals limits of parameter identifiability in multi-parameter models of biochemical dynamics
Source: PubMed Central journal article supplement (PMC4587803; doi:10.1186/s12918-015-0205-8), 2015-09-29
Supplement: 12918_2015_205_MOESM2_ESM.pdf [file 12918_2015_205_MOESM2_ESM.pdf]

Open source R implementation of the clustering algorithm is available at <http://sysbiosig.org/start/resources/>.
